# Supplementary material for: A new procedure for the synthesis of π-conjugated polymers via ligand-free iron(iii)-catalyzed oxidative homocoupling reaction of grignard reagents
Source: Royal Society of Chemistry journal article supplement (doi:10.1039/c2ra21127k), 2012-01-01
Supplement: c2ra21127k.pdf [file c2ra21127k.pdf]

**Supporting Information for**  
**“A New Procedure for the Synthesis of  $\pi$ -Conjugated Polymers via**  
**Ligand-Free Iron(III)-Catalyzed Oxidative Homocoupling Reaction of**  
**Grignard Reagents”**

By Chao Yuan and Qiang Fang\*

*Key Laboratory of Organofluorine Chemistry and Laboratory for Polymer Materials, Shanghai  
Institute of Organic Chemistry, Chinese Academy of Sciences, 345 Lingling Road, Shanghai 200032,  
PR China.*

**1. GPC results for the polymers.**

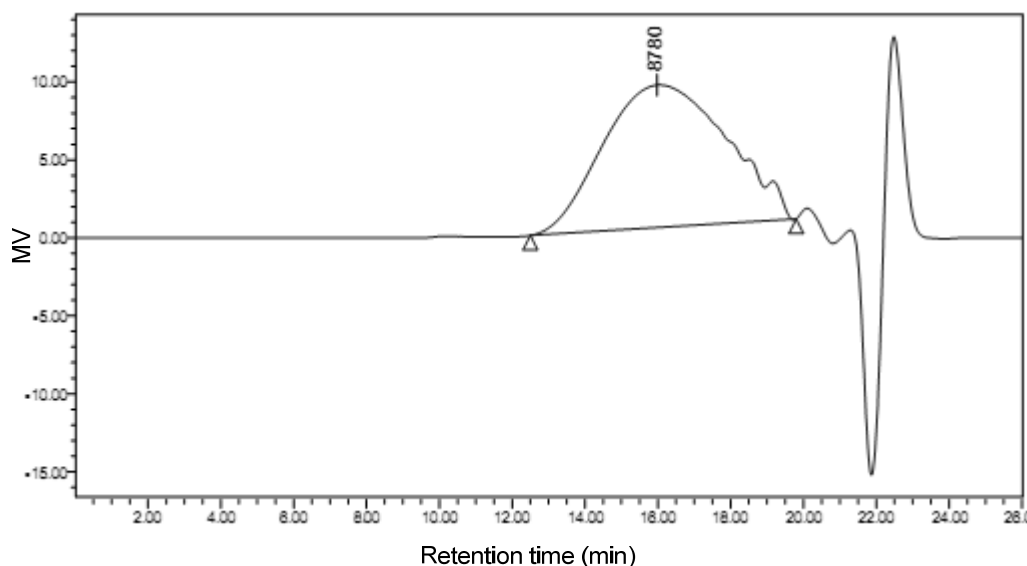

**Fig. S-1 GPC curve of PFO, obtained by precipitating in methanol.**

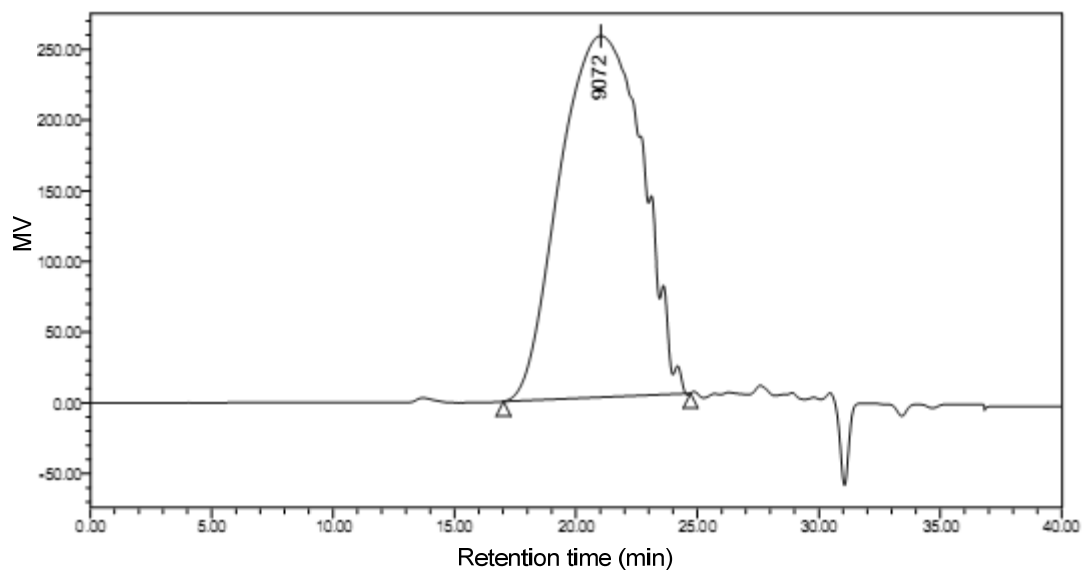

**Fig. S-2 GPC curve of PFO, obtained by extracting with acetone for 24 hr in a Soxhlet extractor.**

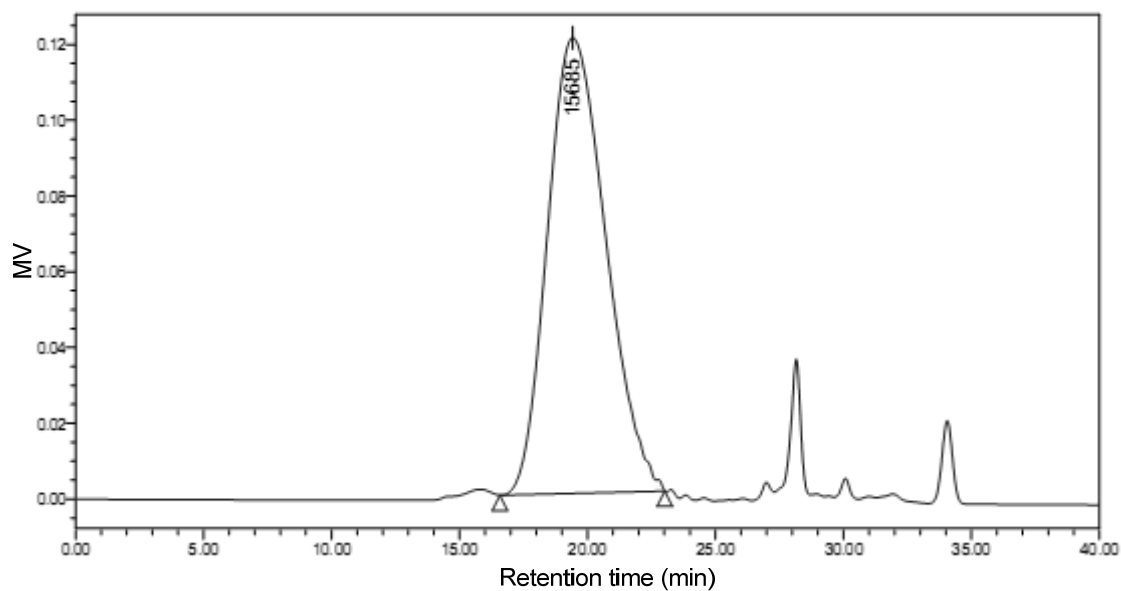

**Fig. S-3 GPC curve of PFO, obtained by precipitating in a mixture of methanol and THF (1:2, v/v).**

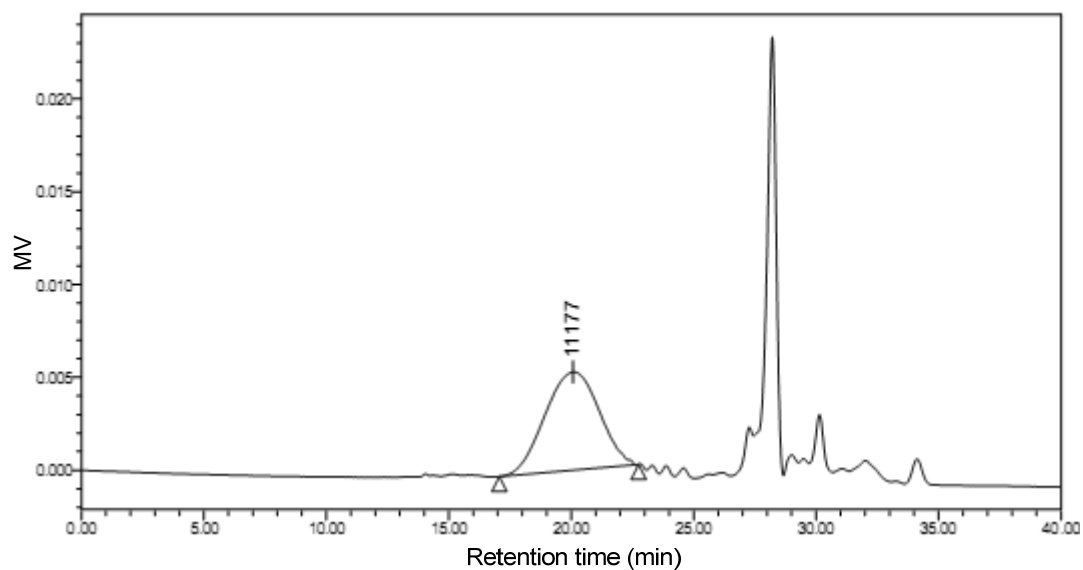

**Fig. S-4 GPC curve of PFO after the polymerization was run for 1 min.**

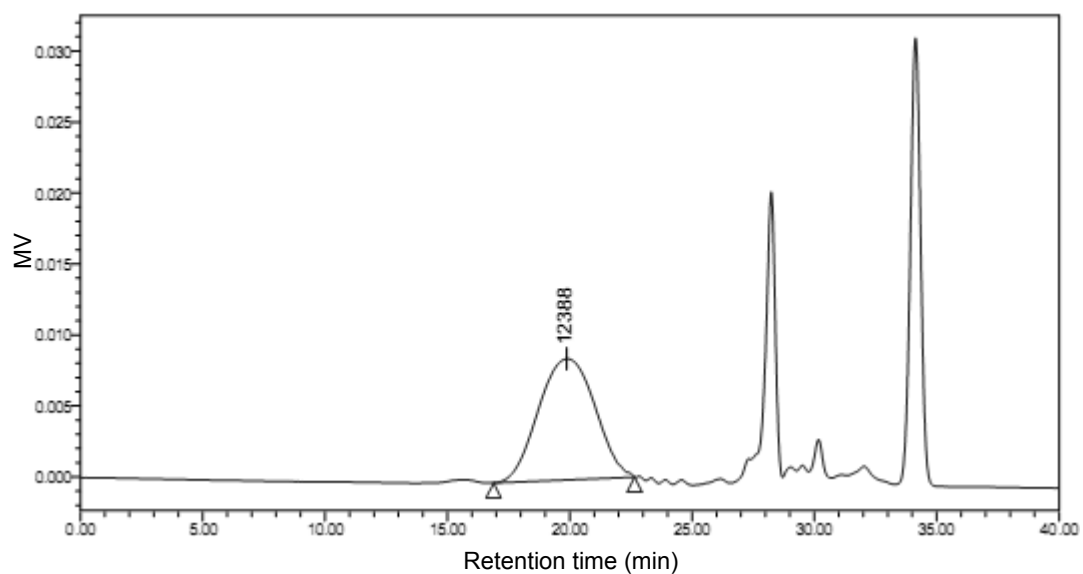

**Fig. S-5 GPC curve of PFO after the polymerization was run for 2 min.**

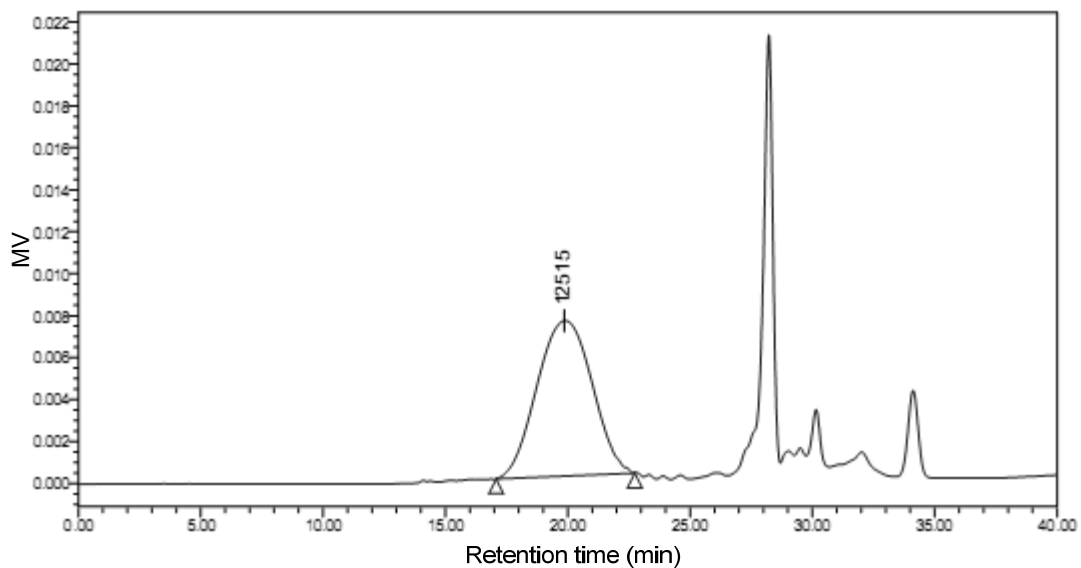

**Fig. S-6** GPC curve of PFO after the polymerization was run for 3 min.

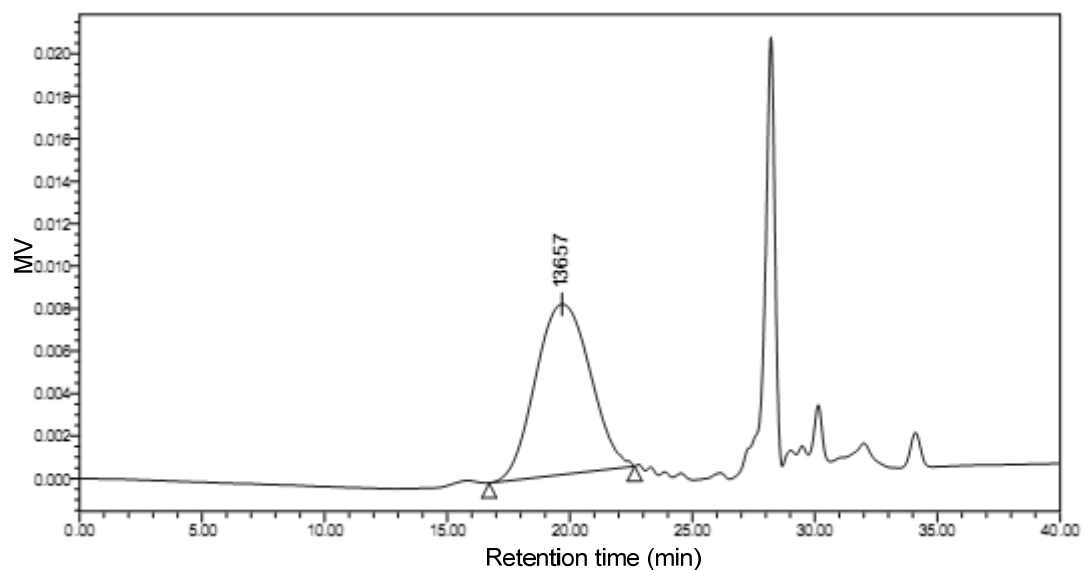

**Fig. S-7** GPC curve of PFO after the polymerization was run for 5 min.

## 2. NMR spectra of the polymers

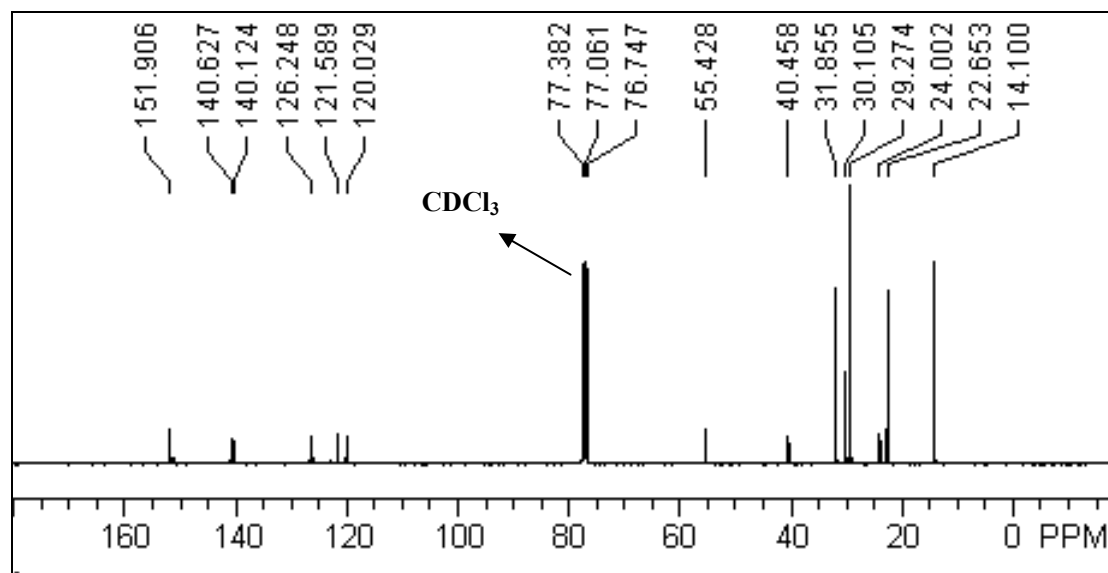

**Fig. S-8**  $^{13}\text{C}$  NMR spectrum of poly(9,9-dioctyl-2,7-fluorene)(PFO) (125 M Hz,  $\text{CDCl}_3$ ).

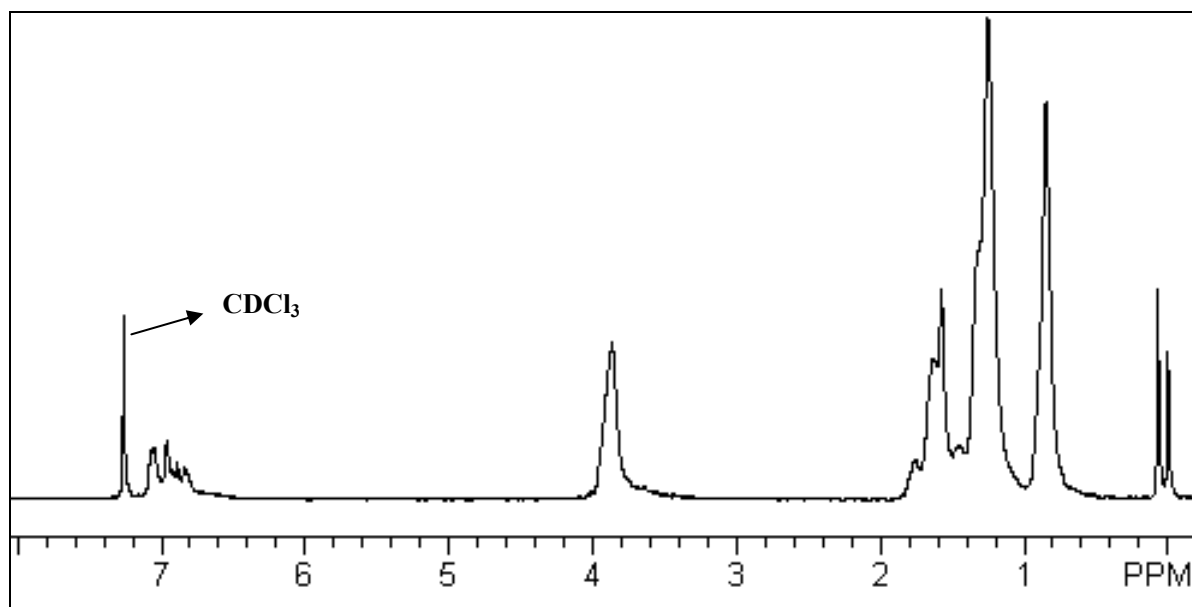

**Fig. S-8**  $^1\text{H}$  NMR spectrum of poly(2,5-dihexyloxyphenylene-1,4-diyl) (PHP) (300 M Hz,  $\text{CDCl}_3$ ).

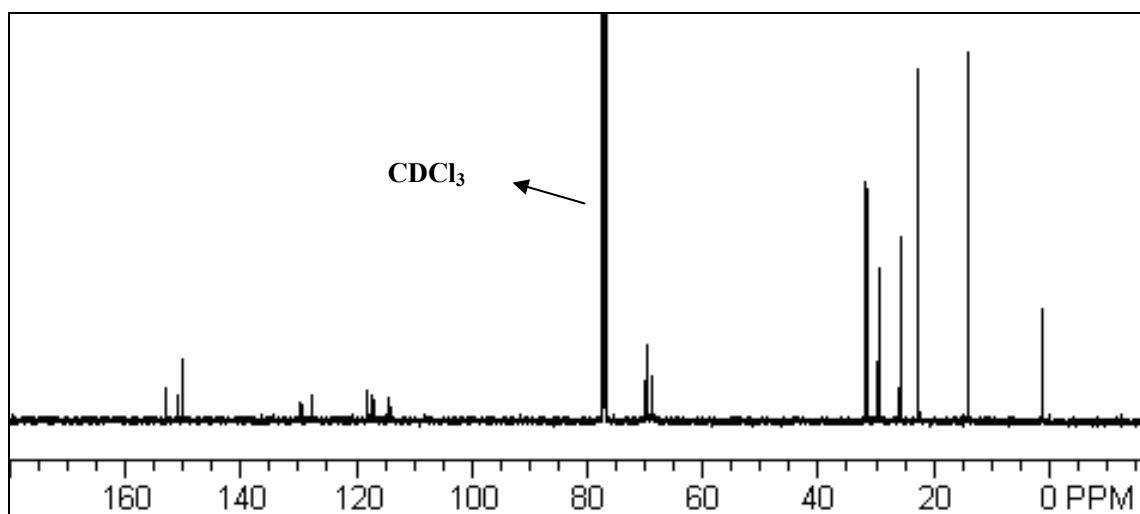

**Fig. S-9**  $^{13}\text{C}$  NMR spectrum of poly(2,5-dihexyloxyphenylene-1,4-diyl) (PHP) (125 M Hz,  $\text{CDCl}_3$ ).

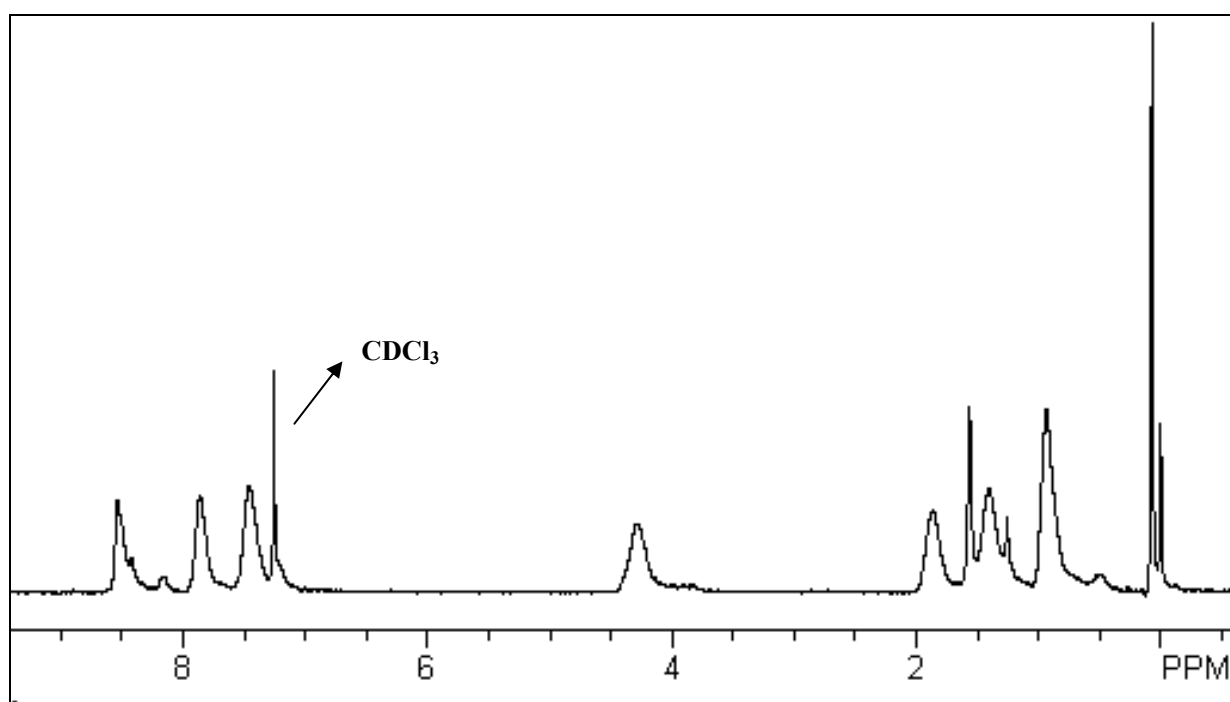

**Fig. S-10**  $^1\text{H}$  NMR spectrum of poly(N-butyl-carbazol-3,6-diyl) (PBC) (300 M Hz,  $\text{CDCl}_3$ ).

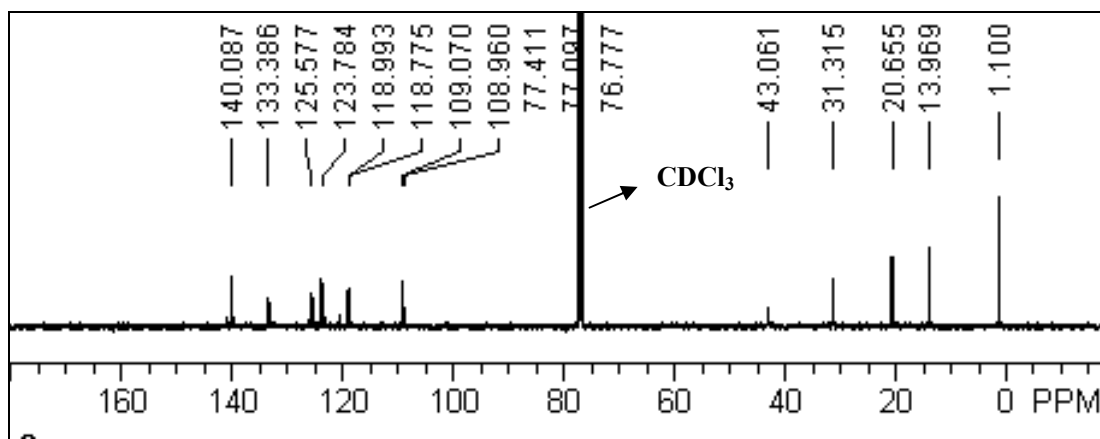

**Fig. S-11**  $^{13}\text{C}$  NMR spectrum of poly(N-butyl-carbazol-3,6-diyl) (PBC) (125 M Hz,  $\text{CDCl}_3$ ).
